**1 Ultra-fast and onsite interrogation of Severe Acute Respiratory**  
**2 Syndrome Coronavirus 2 (SARS-CoV-2) in environmental**  
**3 specimens via surface enhanced Raman scattering (SERS)**

4 Dayi Zhang<sup>1,\*</sup>, Xiaoling Zhang<sup>2</sup>, Rui Ma<sup>2,3</sup>, Songqiang Deng<sup>2,3</sup>, Xinquan Wang<sup>4</sup>,  
 5 Xian Zhang<sup>1</sup>, Xia Huang<sup>1</sup>, Yi Liu<sup>1</sup>, Guanghe Li<sup>1</sup>, Jiuhi Qu<sup>1,5</sup>, Yu Zhu<sup>6</sup>, Junyi  
 6 Li<sup>2,\*</sup>

- 7 1. School of Environment, Tsinghua University, Beijing 100084, P.R. China  
 8 2. Suzhou Yiqing Environmental Science and Technology LTD., Suzhou  
 9 215163, P.R. China  
 10 3. Research Institute for Environmental Innovation (Tsinghua-Suzhou),  
 11 Suzhou 215163, P.R. China  
 12 4. School of Life Science, Tsinghua University, Beijing 100084, P.R. China  
 13 5. Key Laboratory of Drinking Water Science and Technology, Research  
 14 Center for Eco-Environmental Sciences, Chinese Academy of Sciences,  
 15 Beijing 100085, P.R. China  
 16 6. Suzhou Institute of Nano-Tech and Nano-Bionics, Chinese Academy of  
 17 Sciences, 398 Ruoshui Road, Suzhou Industrial Park, Suzhou 215123, P.R.  
 18 China

**20 Corresponding author**

21 Dr Dayi Zhang

22 School of Environment, Tsinghua University, Beijing 100084, P.R. China

23 Email: [zhangdayi@tsinghua.edu.cn](mailto:zhangdayi@tsinghua.edu.cn)

24 Tel: +86(0)10-62773232; Fax: +86(0)10-62795687

25 Dr Junyi Li

26 Suzhou Yiqing Environmental Science and Technology LTD., Suzhou 215163,  
 27 P.R. China

28 Email: [junyi\\_sz@163.com](mailto:junyi_sz@163.com)

29 Tel: +86(0)10-62849151; Fax: +86(0)10-62795687

## 30 Abstract

31 The outbreak of coronavirus infectious disease-2019 (COVID-19) pneumonia  
 32 challenges the rapid interrogation of the severe acute respiratory syndrome  
 33 coronavirus 2 (SARS-CoV-2) in human and environmental specimens. In this  
 34 study, we developed an assay using surface enhanced Raman scattering  
 35 (SERS) coupled with multivariate analysis to diagnose SARS-CoV-2 in an  
 36 ultra-fast manner without any pretreatment (e.g., RNA extraction). Using  
 37 silver-nanorod SERS array functionalized with cellular receptor  
 38 angiotensin-converting enzyme 2 (ACE2), we obtained strong SERS signals of  
 39 ACE2 at 1032, 1051, 1089, 1189, 1447 and 1527  $\text{cm}^{-1}$ . The recognition and  
 40 binding of receptor binding domain (RBD) of SARS-CoV-2 spike protein on  
 41 SERS assay significantly quenched the spectral intensities of most peaks and  
 42 exhibited a shift from 1189 to 1182  $\text{cm}^{-1}$ . On-site tests on 17 water samples  
 43 with a portable Raman spectrometer proved its accuracy and easy-operation  
 44 for spot diagnosis of SARS-CoV-2 to evaluate disinfection performance,  
 45 explore viral survival in environmental media, assess viral decay in wastewater  
 46 treatment plant and track SARS-CoV-2 in pipe network. Our findings raise a  
 47 state-of-the-art spectroscopic tool to screen and interrogate viruses with RBD  
 48 for human cell entry, proving its feasibility and potential as an ultra-fast  
 49 diagnostic tool for public health.

50

# 1. Introduction

The outbreak of coronavirus infectious disease-2019 (COVID-19) pneumonia since 2019 is caused by the severe acute respiratory syndrome coronavirus 2 (SARS-CoV-2)<sup>1, 2, 3</sup> and it has rapidly spread throughout 202 countries around the world. Till 19<sup>th</sup> April 2020, there have been over 2 million confirmed cases and 220,000 deaths globally, and the number is still increasing rapidly. As there is clear evidence of human-to-human transmission of SARS-CoV-2<sup>2, 4, 5, 6</sup>, e.g., direct contact, respiratory droplets<sup>3, 7, 8</sup> and stools<sup>9, 10, 11, 12, 13, 14</sup>, how to interrogate SARS-CoV-2 in human and environmental specimens draws more attentions for effectively confirming COVID-19 cases and identifying transmission routes. It brings urgent requirement of developing diagnostic tools that can rapidly and specifically recognize SARS-CoV-2 in tracking patients.

Many approaches can detect SARS-CoV-2 with high specificity, e.g., real-time reverse transcription quantitative polymerase chain reaction (RT-qPCR) and serological enzyme-linked immunosorbent assays (ELISA). RT-qPCR targeted viral specific RNA fragment with specific primers for the open reading frame 1ab (CDDC-ORF), nucleocapsid protein (CDDC-N), envelope protein, membrane protein, or RNA-dependent RNA polymerase (RdRp)<sup>15, 16, 17, 18</sup>. RNA extraction from swab samples is necessary for RT-qPCR and requires time-consuming pretreatment normally taking more than 4 hours<sup>19, 20</sup>, bringing a barrier for rapid diagnosis of SARS-CoV-2. Alternatively, ELISA is a commonly used an enzyme immunoassay to detect a receptor using antibodies directed against the antigen<sup>21</sup>, targeting the immunological markers, IgM and IgG antibodies, which are reported to increase in the blood of most patients more than a week after infection<sup>22</sup>. However, this method is still time-consuming and not feasible for diagnosing SARS-CoV-2 in environmental media which do not have immunological markers<sup>23, 24, 25</sup>. It is of great urgency to develop a rapid, reproducible, cheap and sensitive assay detecting SARS-CoV-2, especially applicable for different specimens.

Raman spectroscopy is a vibrational spectroscopy of ability to detect chemical bonds *via* photon scattering, but the generated signals are extremely weak

83 comparing to the incident beam. Thus, surface enhanced Raman scattering  
84 (SERS) is introduced to overcome such inherent limitation and interrogate  
85 trace materials by exploiting the enormous electromagnetic field enhancement  
86 resulted from the excitation of localized surface plasmon resonances at  
87 nanostructured metallic surfaces, mostly gold or silver<sup>26, 27</sup>. It has been widely  
88 applied for biological analysis, e.g., living cell classification<sup>28</sup>, cancer  
89 detection<sup>29</sup>, biological imaging<sup>30</sup> and virus detection<sup>31</sup>. For SARS-CoV-2, the  
90 spike glycoprotein consists of S1 and S2 subunits, and S1 subunit contains a  
91 receptor binding domain (RBD) directly recognizing the human receptor  
92 angiotensin converting enzyme 2 (ACE2) for cell entry<sup>32, 33</sup>. Such recognition  
93 and binding might alter the structure of ACE2 and lead to changes in Raman  
94 spectra. Additionally, the binding specificity allows ACE2 as an anchor to  
95 capture SARS-CoV-2 from human or environmental specimens for  
96 interrogation.

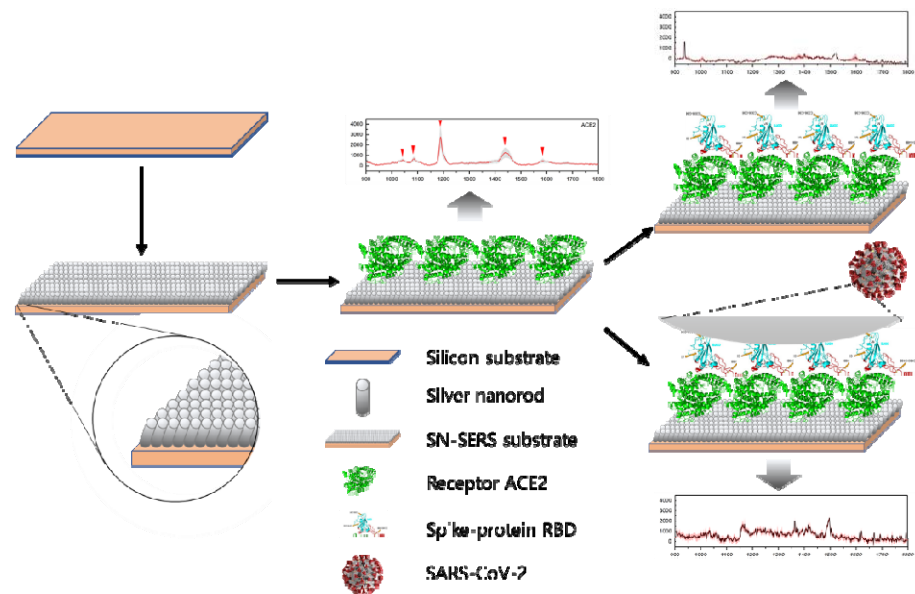

97

98 **Figure 1.** State-of-the-art diagram of surface enhanced Raman scattering  
99 (SERS) for interrogating Severe Acute Respiratory Syndrome Coronavirus 2  
100 (SARS-CoV-2). Human cellular receptor Angiotensin-Converting Enzyme 2  
101 (ACE2) is functionalized on silver-nanorod SERS (SN-SERS) substrate,  
102 designated as ACE2@SN-SERS array, generated strong SERS signals (1032,  
103 1051, 1089, 1189, 1447 and 1527  $\text{cm}^{-1}$ ). The recognition and binding of  
104 receptor binding domain (RBD) of SARS-CoV-2 spike protein on

105 ACE2@SN-SERS assay significantly quenches the spectral intensities of most  
106 peaks and exhibits a red-shift from 1189 to 1182 cm<sup>-1</sup>.

107 In this study, we proposed a 'capture-quenching' strategy to rapidly detect  
108 SARS-CoV-2 and developed a SERS assay introducing ACE2 functionalized  
109 on silver-nanorod SERS substrates to capture and interrogate SARS-CoV-2  
110 spike protein (Figure 1). The induced SERS signal quenching was  
111 documented by either red-shift or whole spectral alterations in multivariate  
112 analysis as biomarkers for the presence of SARS-CoV-2 in real environmental  
113 specimens.

114

## 115 2. Materials and methods

### 116 2.1 Water samples and biological analysis

117 Seventeen water samples were collected from hospitals and pipe network in  
118 Wuhan (China) from 24<sup>th</sup> March to 10<sup>th</sup> April, 2020 (Table 1). Around 2.0 L of  
119 water was directly collected in a plexiglass sampler, placed in 4°C ice-boxes  
120 and immediately transferred into laboratory for RNA extraction following our  
121 reported protocol <sup>34</sup>. Briefly, after centrifugation at 3,000 rpm to remove  
122 suspended solids, the supernatant was subsequently supplemented with NaCl  
123 (0.3 mol/L) and PEG-6000 (10%), settled overnight at 4°C, and centrifuged at  
124 10,000 g for 30 minutes. Viral RNA in pellets was extracted using the EZ1 virus  
125 Mini kit (Qiagen, Germany) according to the manufacturer's instructions.  
126 SARS-CoV-2 RNA was quantified by RT-qPCR using AgPath-ID™ One-Step  
127 RT-PCR Kit (Life Technologies, USA) on a LightCycler 480 Real-time PCR  
128 platform (Roche, USA) in duplicates. Two target genes simultaneously  
129 amplified were open reading frame lab (CCDC-ORF1, forwards primer:  
130 5'-CCCTGTGGGTTTTACTTAA-3'; reverse primer:  
131 5'-ACGATTGTGCATCAGCTGA-3'; fluorescence probe:  
132 5'-FAM-CCGTCTGCGGTATGTGGAAAGGTTATGG-BHQ1-3') and  
133 nucleocapsid protein (CCDC-N, forwards primer:  
134 5'-GGGGAAGTTCTCCTGCTAGAAT-3'; reverse primer:  
135 5'-CAGACATTTTGCTCTCAAGCTG-3'; fluorescence probe:

136 5'-FAM-TTGCTGCTGCTTGACAGATT-TAMRA-3'). RT-qPCR amplification for  
137 CCDC-ORF1 and CCDC-N was performed in 25 µL reaction mixtures  
138 containing 12.5 µL of 2xRT-PCR Buffer, 1 µL of 25xRT-PCR Enzyme Mix, 4 µL  
139 mixtures of forward primer (400 nM), reverse primer (400 nM) and probe (120  
140 nM), and 5 µL of template RNA. Reverse transcription was conducted at  
141 45°C for 10 min (1 cycle), followed by initial denaturation at 90°C for 10 min  
142 (1 cycle) and 40 thermal cycles of 60°C for 45 second and 90°C for 15  
143 seconds. Quantitative fluorescent signal for each sample was normalized by  
144 ROX™ passive reference dye provided in 2xRT-PCR buffer. For each  
145 RT-qPCR run, both positive and negative controls were included. For quality  
146 control, a reagent blank and extraction blank were included for RNA extraction  
147 procedure and no contamination was observed.

148 **Table 1.** Sampling sites and quantification cycle (Cq) values of SARS-CoV-2 in  
149 water samples.

| Samples | Description                                                                                    | Cq       |
|---------|------------------------------------------------------------------------------------------------|----------|
| HSSCC   | Crude water from wards of Huoshenshan Hospital                                                 | 37.05    |
| HSSBC   | Crude water from wastewater treatment plants of Huoshenshan Hospital                           | Negative |
| HSSCD   | Disinfected water from wards of Huoshenshan Hospital                                           | Negative |
| HSSBD   | Disinfected water from wastewater treatment plants of Huoshenshan Hospital                     | Negative |
| JYTCC   | Crude water from wards of Jinyintan Hospital                                                   | 38.34    |
| JYTCC2  | Crude water from wards of Jinyintan Hospital after 1-day storage at 20°C                       | 36.81    |
| JYTCC3  | Crude water from wards of Jinyintan Hospital after 3-day storage at 20°C                       | 34.84    |
| JYTCD   | Disinfected water from wastewater treatment plants of Jinyintan Hospital                       | Negative |
| JYTBC   | Crude water from wastewater treatment plants of Jinyintan Hospital                             | Negative |
| JYTBC2  | Crude water from wastewater treatment plants of Jinyintan Hospital after 1-day storage at 20°C | Negative |
| JYTBC3  | Crude water from wastewater treatment plants of Jinyintan Hospital after 3-day storage at 20°C | Negative |
| HN01    | Upstream waters in pipeline of Huanan Seafood Market                                           | Negative |
| HN02    | Upstream waters in pipeline of Huanan Seafood Market                                           | Negative |
| HN03    | Downstream waters in pipeline of Huanan Seafood Market                                         | Negative |
| HN04    | Downstream waters in pipeline of Huanan Seafood Market                                         | Negative |
| HN05    | Waters in pipeline joint point of Huanan Seafood Market                                        | Negative |
| HN06    | Waters in pipeline joint point of Huanan Seafood Market                                        | 31.64    |

## 150 2.2 Preparation of silver-nanorod SERS array

151 The aligned silver-nanorod SERS (SN-SERS) array was fabricated in oblique  
152 angle deposition (OAD) using a custom-designed electron beam/sputtering  
153 evaporation system (Suzhou Derivative Biotechnology Co., LTD.) and formed

randomly on a 4-inch silicon wafer with increasing deposition time<sup>35</sup>. Briefly, Si-wafer was immersed in absolute alcohol and blow-dried up using N<sub>2</sub> gas prior to loading on the substrate holder. The substrate holder was then fixed on the specially designed Glancing Angle Deposition (GLAD) sample stage in an e-beam evaporator. Deposition was performed at a base pressure lower than 3×10<sup>-4</sup> Pa. The thickness of film growth was monitored using a quartz crystal microbalance. Firstly, a thin layer of about 20 nm was deposited to assist the adhesion of silver on Si-wafer, followed by the deposition of a base layer of 200 nm silver. The GLAD stage was then tilt to 84° with respect to the incident vapor. A layer of 80 nm was then deposited with substrate rotation at 0.1 rev/s to improve the seeding for nanorod growth. The deposition rate was 2 Å/s in each stage and lasted about 3 h.

### 2.3 Fabrication of ACE2@SN-SERS substrate

ACE2 was purchased from Novoprotein (China) and stored in borate buffer solution (0.1 M, pH=7.2) at -80°C before use. SN-SERS substrate was firstly cleaned by thorough rinse with deionized water and dried using N<sub>2</sub> gas flow. Subsequently, 1 µL of ACE2 stock solution was loaded to SN-SERS substrate and placed in an incubator under constant temperature and humidity conditions (25°C; 75%, w/w) for 4 h. ACE2 was then bound onto the surface of SN-SERS substrate, designated as ACE2@SN-SERS substrate, which could be stored in 4°C for 2 weeks before use.

### 2.4 Raman spectral acquisition

For laboratory test, Raman spectra were acquired using a near-infrared confocal Raman microscope (HR evolution, Horiba, USA) equipped with a 785 nm near-IR laser source, a 300 l/mm grating and a semiconductor-cooling detector (CCD). All Raman spectra were collected with a 50× objective lens (NA=0.7) at an exposure time of 10 seconds, 3 accumulations, and laser power of 10 mW prior to lens. Raman spectroscopic system was calibrated with a silicon wafer at Raman shift of 520 cm<sup>-1</sup>. At least five random regions were measured for each sample, and a minimum of 9 individual spectra were acquired per sample. A 785-nm portable Raman spectrometer (Finder Edge, Zolix, China) was used for on-site diagnosis, and the ACE2@SN-SERS



186 substrate was placed on the probe of the portable Raman spectrometer with  
187 the following parameters: 0.5 s acquisition time and 300 mW laser power. At  
188 least five-time measurement was conducted for each sample. For both  
189 laboratory and on-site test, all Raman spectra were recorded in the range of  
190 100-3500  $\text{cm}^{-1}$  in biological triplicates.

## 191 *2.5 Multivariate analysis of Raman spectra*

192 Raw spectral data were pre-processed by using the open source IRootLab  
193 toolbox performed on MATLAB r2012<sup>36</sup>. Briefly, each acquired Raman  
194 spectrum was cut to a biochemical-cell fingerprint region (900-1800  $\text{cm}^{-1}$ ),  
195 baseline corrected, wavelet de-noised, and vector normalized. Unlike  
196 RT-qPCR and ELISA assay, our ACE2@SN-SERS assay generates Raman  
197 spectral data, which are multivariate and difficult to generate an individual  
198 variable for SARS-CoV-2. Thus, we used two approaches to distinguish the  
199 difference between positive and negative samples. Firstly, the ratio of Raman  
200 intensity at 1182  $\text{cm}^{-1}$  to that at 1189  $\text{cm}^{-1}$  was calculated, designated as  
201 1182/1189 ratio, as an indicator for diagnostic prediction. Alternatively,  
202 multivariate analysis was applied to the pre-processed spectral data to reduce  
203 data dimensions and extract key information. Principal component analysis  
204 (PCA) is an unsupervised data analytical method reducing the dimensionality  
205 of data, determining principal components (PCs) and extracting key features<sup>37</sup>,  
206<sup>38, 39</sup>. The first 10 PCs, which account for more than 90% of the variance of the  
207 selected spectral regions, were then inputted into linear discriminate analysis  
208 (LDA), which determines the discriminant function line that maximizes the  
209 inter-class distance and minimizes the intra-class distance to derive an optimal  
210 linear boundary separating the different classes<sup>37</sup>. Generally, PCA-LDA score  
211 plots and cluster vectors are generated, and the scores of the linear  
212 discriminant 1 (LD1) provides the best classification<sup>39, 40</sup>.

## 213 *2.6 Statistical analysis*

214 One-way ANOVA was used to compare the difference between samples and



215 p-value less than 0.05 refers to statistically significant difference.

## 216 **3. Results and discussions**

### 217 *3.1 Features of SN-SERS and ACE2@SN-SERS substrates*

218 SEM images (Figure 2A) illustrated a successful fabrication of silver nanorods  
219 on SERS substrate. The overall diameter and length of silver nanorods was  
220  $211 \pm 45$  and  $737 \pm 52$  nm, respectively, and the uniform structure demonstrated  
221 a density of 8 nanorods/ $\mu\text{m}^2$ . After functionalization with ACE2 protein, clear  
222 protein structures were observed on ACE2@SN-SERS substrate, exhibiting as  
223 small islands with a diameter of 2  $\mu\text{m}$  (Figure 2B).

224 The background Raman signals of SN-SERS substrate without ACE2  
225 exhibited no significant peaks from 900 to 1800  $\text{cm}^{-1}$  (Figure 2C), showing a  
226 satisfactory performance for interrogating bio-related SERS.  
227 ACE2@SN-SERS substrate generated remarkable SERS signals, around 400  
228 times stronger than SN-SERS substrate (Figure 2C). The featured Raman  
229 peaks are probably assigned with phenylalanine ( $1032 \text{ cm}^{-1}$ )<sup>41</sup>, C-N stretching  
230 in protein ( $1089 \text{ cm}^{-1}$ )<sup>42</sup>, Amide III for C-N stretching and N-H bending ( $1189$   
231  $\text{cm}^{-1}$ )<sup>43</sup>,  $\text{CH}_2$  bending mode of proteins ( $1447 \text{ cm}^{-1}$ )<sup>44</sup> and conjugated -C=C- in  
232 protein ( $1587 \text{ cm}^{-1}$ )<sup>45</sup>.

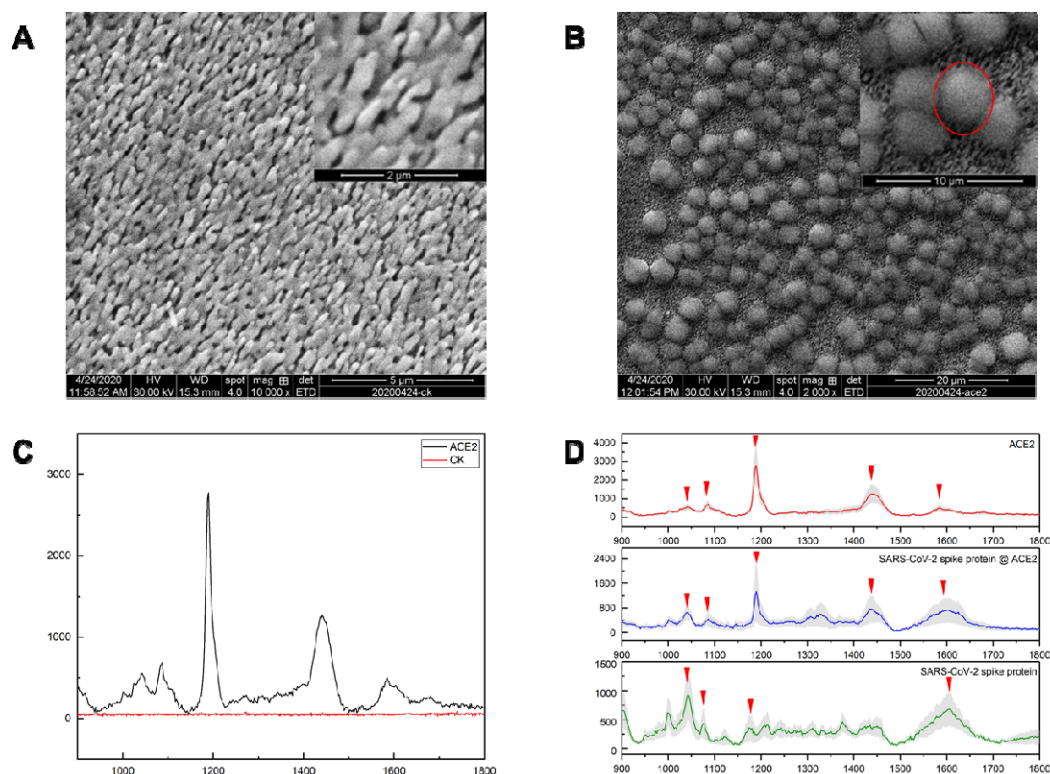

**Figure 2.** (A) SEM image of SN-SERS substrate. Scale bar: 5 μm (upper right: 2 μm). (B) SEM image of ACE2@SN-SERS substrate. Scale bar: 20 μm (upper right: 10 μm). Functionalized ACE2 protein is present as 'islands' (red circle). (C) SERS signals of SN-SERS substrate without ACE2-functionalization (CK) and ACE2@SN-SERS substrate (ACE2). (D) Comparison of SERS signals between ACE2@SN-SERS substrate, SARS-CoV-2 spike protein on SN-SERS substrate and SARS-CoV-2 spike protein on ACE2@SN-SERS substrate. Featured SERS signals of ACE2 protein include 1032, 1089, 1189, 1447 and 1587 cm<sup>-1</sup>.

### 3.2 SERS detection of SARS-CoV-2 spike protein

SARS-CoV-2 spike protein was firstly tested on SN-SERS and ACE2@SN-SERS substrates as a proof-of-concept demonstration. Different from ACE2 protein, Raman peak intensities derived from SARS-CoV-2 spike protein were relatively weak on SN-SERS substrate and the distinct peaks were mostly located at 1032, 1051 and 1447 cm<sup>-1</sup> (Figure 2D). They are probably assigned to phenylalanine (1032 cm<sup>-1</sup>)<sup>41</sup>, C-N stretching in protein (1051 cm<sup>-1</sup>)<sup>42</sup>, Amide III for C-N stretching and N-H bending (1189 cm<sup>-1</sup>)<sup>43</sup>, CH<sub>2</sub>

251 bending mode of proteins ( $1447\text{ cm}^{-1}$ )<sup>44</sup>. After loading spike proteins onto  
 252 ACE2@SN-SERS substrate, the whole spectra exhibited a quenching of  
 253 SERS signal intensity, especially at Raman shifts of 1089, 1189 and  $1447\text{ cm}^{-1}$   
 254 (Figure 2D). Particularly, a red-shift from 1189 to  $1182\text{ cm}^{-1}$  representing N-H  
 255 bending was observed. It is possibly induced by the change in N-H vibration  
 256 mode or the bond length of N-H<sup>46, 47</sup>, in response to the interfered H-bond of  
 257 ACE2 after recognizing SARS-CoV-2 spike protein. The crystal structure of  
 258 SARS-CoV-2 spike RBD bound to the ACE2 receptor indicates the networks of  
 259 hydrophilic interactions at RBD/ACE2 interfaces<sup>33</sup>, which exhibits a  
 260 conceivable existence of hydrogen bond elucidating the strength change of  
 261 N-H bond<sup>38</sup> and explains the Raman spectral red-shift from 1189 to  $1182\text{ cm}^{-1}$ .  
 262 Thus, our results indicated that SARS-CoV-2 spike protein can be recognized  
 263 and bound by ACE2@SN-SERS substrate, consequently changing ACE2  
 264 structure to induce the SERS signal quenching. Such significant Raman signal  
 265 change demonstrated that our designed ACE2@SN-SERS assay has a  
 266 satisfactory performance in SARS-CoV-2 interrogation.

### 267 *3.3 Performance of ACE2@SN-SERS in interrogating SARS-CoV-2 in* 268 *real water samples*

269 In on-site test, Raman spectra of ACE2 acquired via the portable Raman  
 270 spectrometer exhibited coherent spectral peaks presented at 1032, 1052,  
 271 1089, 1189,  $1447\text{ cm}^{-1}$  comparing to those from the research-level  
 272 Raman spectrometer in laboratory (Figure 4A), although relatively high signal  
 273 noises were observed. It indicated the robustness of our developed  
 274 ACE2@SN-SERS array and feasibility for on-site diagnosis. Raman spectra of  
 275 water samples on ACE2@SN-SERS array exhibited different SERS spectra  
 276 (Figure 4A). Some of them illustrated significant signal quenching, e.g., JYTCC,  
 277 JYTCC2 and JYTCC3, whereas others possessing similar spectral patterns as  
 278 ACE2@SN-SERS array included HSSCD, HSSBD, etc.

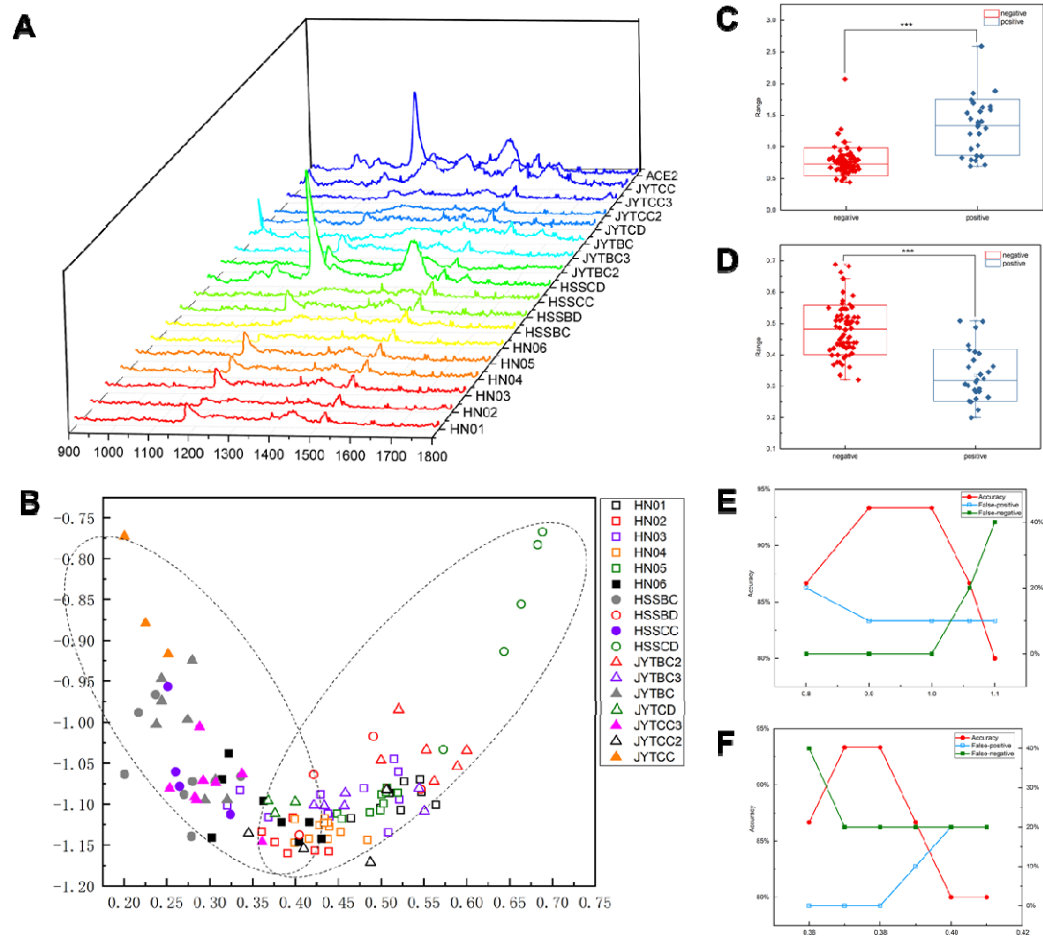

279

280 **Figure 3.** (A) SERS spectra of ACE2@SN-SERS and 17 tested water samples  
 281 by ACE2@SN-SERS assay (mean value) using a portable Raman  
 282 spectrometer. (B) Segregation of positive and negative water sample groups in  
 283 PCA-LDA score plot. Solid and white dots represent positive and negative  
 284 results for SARS-CoV-2, respectively. Grey dots refer to susceptible samples of  
 285 HSSBC and JYTBC. (C) Difference of 1182/1189 ratio between positive and  
 286 negative groups. (D) Difference of LD1 scores between positive and negative  
 287 groups. (E) Accuracy, false positive and false-negative percentage based on  
 288 1182/1189 ratio. (F) Accuracy, false positive and false-negative percentage  
 289 based on LD1 scores.

290 RT-qPCR results had separated all water samples into positive and negative  
 291 groups for SARS-CoV-2. To distinguish these two groups from SERS spectra,  
 292 we first used 1189/1182 ratio as a biomarker, as the red-shift from 1189 to 1182  
 293 cm<sup>-1</sup> was the most remarkable spectral alteration. Figure 3C shows a

294 significant difference in 1189/1182 ratio between positive and negative groups  
295 ( $p < 0.001$ ), averagely  $1.311 \pm 0.446$  and  $0.766 \pm 0.218$ , respectively. Setting  
296 0.900 or 1.000 as the threshold, the accuracy of 1189/1182 ratio reaches  
297 93.33%, and the false-positive and false-negative percentage is 10% and 0%,  
298 respectively (Figure 3E). Thus, 1189/1182 ratio is a satisfactory biomarker to  
299 diagnose the presence of SARS-CoV-2 in water samples.

300 Nevertheless, the intrinsic SERS analysis provided convoluted Raman signals  
301 derived from ACE2 proteins or complexes of ACE2 and spike protein of  
302 SARS-CoV-2 located in plasmonic hot spot regions, it is crucial to employ  
303 multivariate method to extract information in these complex multivariable  
304 spectroscopic data for a better interrogation. Herein, the whole Raman spectra  
305 from 900 to  $1800 \text{ cm}^{-1}$  acquired Raman data from on-site test were analyzed  
306 by PCA-LDA in a hierarchical manner. PCA-LDA score plot clearly segregates  
307 the positive and negative groups regardless some overlaps (Figure 3B). The  
308 grey-labeled samples (HSSBC and JYTBC) are negative for SARS-CoV-2 by  
309 RT-PCR but fall into the positive group in PCA-LDA, whereas HN06 in  
310 PCA-LDA negative group had a Cq value of 31.61. Such contradictory results  
311 might be explained by different principles between these two assays.  
312 RT-qPCR targets SARS-CoV-2 RNA fragment, whereas our ACE2@SN-SERS  
313 assay recognizes SARS-CoV-2 spike protein. As RNA has a shorter half-life  
314 and is more easily degraded than protein, SARS-CoV-2 spike protein occur  
315 hypothetically longer time than RNA, particularly after disinfection could  
316 breakdown viral envelopes and RNA. Since LD1 scores derived from PCA-LDA  
317 model provide the best classification, they are assigned as criteria and exhibit  
318 significant difference between the positive and negative groups ( $p < 0.001$ ). The  
319 accuracy by LD1 scores is 93.33% when the threshold is 0.370 or 0.380, while  
320 the false-positive or false-negative percentage is 0% and 20%, respectively.  
321 Together with 1182/1189 ratio, our findings proved the feasibility of the  
322 developed ACE2@SN-SERS assay to on-site interrogate SARS-CoV-2 in real  
323 water samples, and both indicators (1182/1189 ratio and LD1 scores) have  
324 satisfactory performances.

### 325 3.4 Presence of SARS-CoV-2 in real water samples from Wuhan

326 Cq value of crude water from wards of Huoshenshan Hospital (HSSCC) and  
 327 Jinyintan Hospital (JYTCC) was 37.05 and 38.34, respectively, showing the  
 328 presence of SARS-CoV-2 viral RNA. The results became negative in the  
 329 biological treatment sector (HSSBC) and aerobic biodegradation sector  
 330 (JYTBC) in the wastewater treatment plants of Huoshenshan and Jinyintan  
 331 Hospitals (Table 1). However, both 1182/1189 ratios and LD1 scores by  
 332 ACE2@SN-SERS assay had contradictory results that SARS-CoV-2 was  
 333 present in all wastewater samples throughout in the treatment process despite  
 334 of slight decay (Figure 4A and 4E). It might be explained by higher stability of  
 335 SARS-CoV-2 spike protein than RNA after disinfection, and the residual spike  
 336 proteins were still detectable but the infectivity was of low risk. Our findings  
 337 indicated a decay of SARS-CoV-2 viral RNA along wastewater treatment  
 338 process, consistent with previous reported facts that both RNA (Norovirus GGI,  
 339 GGII, sapovirus, and Aichi virus)<sup>48, 49, 50</sup> and DNA viruses (enteric  
 340 adenoviruses, JC polyomaviruses, BK polyomaviruses)<sup>50</sup> were effectively  
 341 removed in conventional and biological wastewater treatment plants. The  
 342 presence of SARS-CoV-2 in adjusting tanks might pose threats to workers for  
 343 medical wastewater treatment, and their personal care protections are  
 344 suggested to prevent potential infection. The rapidness and easy operation of  
 345 this developed ACE2@SN-SERS assay offers a solution to monitor  
 346 SARS-CoV-2 in medical wastewater treatment plants, allowing on-site  
 347 assessment of potential spreading risks on workers and surrounding  
 348 environment.

349 Disinfection with 500 mg/L of sodium hypochlorite completely removed  
 350 SARS-CoV-2 viral RNA, exhibiting negative RT-qPCR and ACE2@SN-SERS  
 351 results for disinfected water from wards of Huoshenshan Hospital (HSSCD),  
 352 wastewater treatment plant of Huoshenshan Hospital (HSSBD), and wards of  
 353 Jinyintan Hospital (JYTCD) (Figure 4B and 4F). These results documented the  
 354 robustness of ACE2@SN-SERS assay and matched well with a previous  
 355 study that coronaviruses was efficiently inactivated by surface disinfection  
 356 procedures<sup>51</sup>.



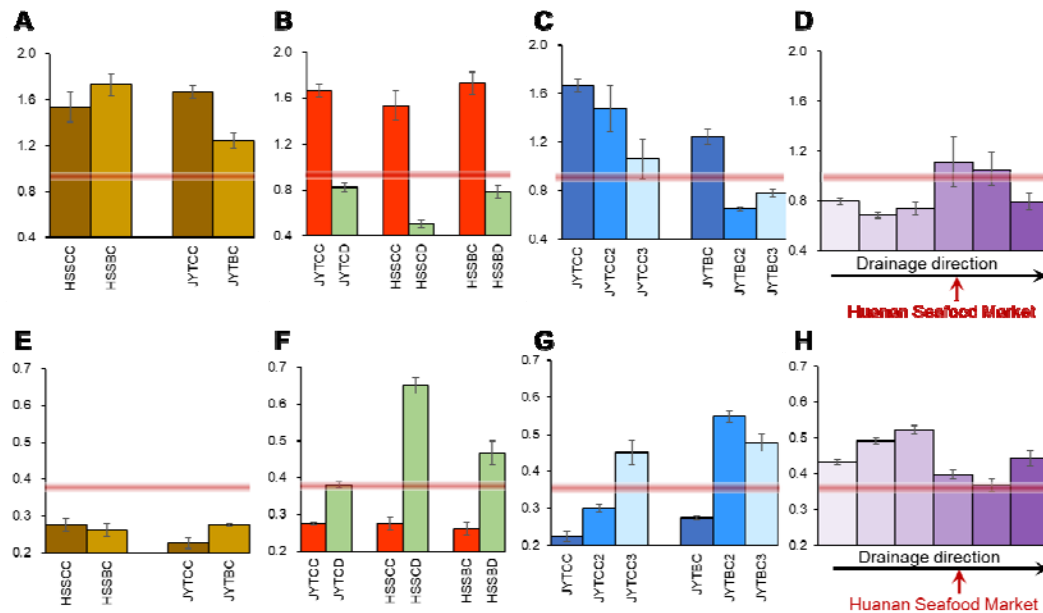

357

358 **Figure 4.** Applications of on-site SERS interrogation for SARS-CoV-2. Change  
359 of 1189/1182 ratio (A) and LD1 score (E) along wastewater treatment process  
360 for wastewater treatment plant management. Significant difference of  
361 1189/1182 ratio (B) and LD1 score (F) between crude and disinfected waters  
362 for determination of disinfection efficiency. Change of 1189/1182 ratio (C) and  
363 LD1 score (G) for viral survival in environmental media. Occurrence of  
364 SARS-CoV-2 in the pipeline of Huanan Seafood Market by 1189/1182 ratio (D)  
365 and LD1 score (H).

366 SARS-CoV-2 was positive in JYTCC2 (1-day storage at 20°C) and JYTCC3  
367 (3-day storage at 20°C) as evidenced by both RT-qPCR and  
368 ACE2@SN-SERS assays (Figure 4C), suggesting SARS-CoV-2 viral RNA or  
369 spike protein could persist in medical wastewater for at least 3 day (Figure 4C  
370 and 4G). SARS-CoV-2 could survive longer on plastic and stainless steel than  
371 copper and cardboard, up to 72 hours<sup>52</sup>. Our results provided evidence using  
372 two assays to show the prolonged presence of SARS-CoV-2 in medical  
373 wastewater.

374 Diagnosing patients and tracking asymptomatic candidates is one of major  
375 challenges for COVID-19 prevention and control. In this work, we collected  
376 water samples from pipeline receiving discharge from Huanan Seafood Market,  
377 a suspected first place of COVID-19 outbreak in China. The upstream waters



in pipeline around Huanan Seafood Market demonstrated negative RT-qPCR results for SARS-CoV-2 viral RNA, and exhibited no SARS-CoV-2 spike protein from clear Raman shifts at  $1189\text{ cm}^{-1}$  in ACE2@SN-SERS assay (Figure 3A). After receiving wastewater from Huanan Seafood Market, the positive RT-qPCR results (Table 1,  $C_q=31.64$ ), 1182/1189 ratios (Figure 4D) and LD1 scores (Figure 4H) hinted the entry of SARS-CoV-2 into pipelines, and it declined in downstream pipe network. Different from RT-qPCR assay requiring RNA extraction and laboratory amplification, the developed ACE2@SN-SERS assay allows onsite diagnosis of SARS-CoV-2 with portable Raman spectrometers, showing huge potentials for field practices to track the presence and source of SARS-CoV-2 in sewage pipe network.

### 3.5 Prospective

In this study, our developed ACE2@SN-SERS assay provides good accuracy and satisfactory performance for the rapid and onsite diagnosis of SARS-CoV-2 in environmental specimens, meeting well with RT-qPCR results. Compared with RT-qPCR and ELISA assays, this ACE2@SN-SERS assay has three advantages. Firstly, ACE2@SN-SERS assay does not rely on RNA extraction or immune biomarker, simplifying the sample preparation procedure and shortening the measurement time. Secondly, spike protein is more stable than RNA as the biomarker for SARS-CoV-2, hinting a more stable and sensitive assay particularly for environmental specimens. Last but not the least, we have proved that portable Raman spectrometers can provide satisfactory signals with ACE2@SN-SERS assay and allows rapid interrogation of SARS-CoV-2 on site.

There are some limitations in this work. Firstly, our ACE2@SN-SERS assay cannot evaluate viral viability or infectivity as free spike proteins or viral envelop are also recognizable by ACE2@SN-SERS substrates to quench SERS signals, possibly overestimating the presence of SARS-CoV-2 in human or environmental specimens. Secondly, only limited real samples were tested and the interference of other viruses targeting ACE2 for cell entry is still questionable, owing to the restriction in sample collection and clinical tests during the outbreak of COVID-19 in Wuhan. Nevertheless, the mentioned

410 advantages prove ACE2@SN-SERS assay as a reliable and for mobile  
411 detection platform or screening system for clinal and environmental diagnosis  
412 onsite under a variety of conditions. Our state-of-the-art work also raises a  
413 concept to screen other viruses with RBD recognizing receptors of human cells  
414 for entry and evaluate the recognition strength of SARS-like viruses across  
415 mammalian species, when different RBD-containing viruses are tested or  
416 human cell receptors are functionalized for substrate fabrication. As a possible  
417 in-vitro assay, ACE2@SN-SERS substrate might also contribute to the  
418 assessment of vaccine efficiency. Further studies need to address those  
419 possibilities and establish robust databases and algorithms for a faster  
420 interrogation, even down to 1 min, for clinical and environmental purposes.

#### 421 **4. Conclusion**

422 A novel ACE2@SN-SERS assay was developed in this study by  
423 functionalizing human cellular receptor ACE2 proteins on silver-nanorods and  
424 generating strong SERS signals. The successful and significant quenching of  
425 SERS signal intensities in the presence of SARS-CoV-2 spike proteins proved  
426 its capability in capturing and recognizing SARS-CoV-2. Onsite tests on 17  
427 water samples using a portable Raman spectrometer achieved satisfactory  
428 performance in interrogating the presence of SARS-CoV-2 in environmental  
429 specimens, although some inconsistent with RT-qPCR results. At the current  
430 stage, the developed ACE2@SN-SERS assay had acceptable accuracy,  
431 false-positive and false-negative percentages, which can be further improved  
432 by fabrication implementation, database set-up and algorithm optimization. It  
433 has a bright future and huge potential as a rapid and on-site diagnostic tool for  
434 SARS-CoV-2 and other viruses to confirm patients, determine community  
435 cases and track environmental viral sources in pandemics.

#### 436 **5. Acknowledgement**

437 The authors would like to thank the project from Ministry of Science and  
438 Technology of the People's Republic of China (2020YFC0842500) for  
439 providing water samples, and Science and Technology Service Network  
440 Initiatives (KFJ-STS-QYZX-061) and Scientific Research Equipment  
441 Development Project (YZ201653) for SN-SERS substrate fabrication.

442 **6. Author contributions**

443 Concept and design: DZ.

444 Laboratory data acquisition: XZ, RM, YZ, JL.

445 On-site data acquisition: DZ, XZ.

446 Analysis or interpretation of data: DZ, SD, XW, XH, YL, GL, JQ.

447 Drafting of the manuscript: DZ, JL.

448 Statistical analysis: DZ, JL.

449

## References

1. Ralph R, *et al.* 2019-nCoV (Wuhan virus), a novel Coronavirus: human-to-human transmission, travel-related cases, and vaccine readiness. *Journal of Infection in Developing Countries* **14**, 3-17 (2020).
2. Li Q, *et al.* Early Transmission Dynamics in Wuhan, China, of Novel Coronavirus–Infected Pneumonia. *New England Journal of Medicine* **382**, 1199-1207 (2020).
3. Lai C-C, Shih T-P, Ko W-C, Tang H-J, Hsueh P-R. Severe acute respiratory syndrome coronavirus 2 (SARS-CoV-2) and coronavirus disease-2019 (COVID-19): The epidemic and the challenges. *Int J Antimicrob Agents* **55**, 105924 (2020).
4. Chan JFW, *et al.* A familial cluster of pneumonia associated with the 2019 novel coronavirus indicating person-to-person transmission: a study of a family cluster. *Lancet* **395**, 514-523 (2020).
5. Poon LLM, Peiris M. Emergence of a novel human coronavirus threatening human health. *Nat Med*, 1-2 (2020).
6. Chang D, *et al.* Epidemiologic and Clinical Characteristics of Novel Coronavirus Infections Involving 13 Patients Outside Wuhan, China. *JAMA* **323**, 1092-1093 (2020).
7. Carlos WG, Dela Cruz CS, Cao B, Pasnick S, Jamil S. Novel Wuhan (2019-nCoV) Coronavirus. *American Journal of Respiratory and Critical Care Medicine* **201**, P7-P8 (2020).
8. Wu J, *et al.* Clinical Characteristics of Imported Cases of COVID-19 in Jiangsu Province: A Multicenter Descriptive Study. *Clinical Infectious Diseases*, ciaa199 (2020).
9. Holshue ML, *et al.* First Case of 2019 Novel Coronavirus in the United States. *New England Journal of Medicine* **382**, 929-936 (2020).
10. Tian Y, Rong L, Nian W, He Y. Review article: Gastrointestinal features in COVID-19 and the possibility of faecal transmission. *Alimentary Pharmacology & Therapeutics*, doi: 10.1111/apt.15731 (2020).
11. Zhang J, Wang S, Xue Y. Fecal specimen diagnosis 2019 Novel Coronavirus–Infected pneumonia. *Journal of Medical Virology*, <https://doi.org/10.1002/jmv.25742> (2020).
12. Ling Y, *et al.* Persistence and clearance of viral RNA in 2019 novel coronavirus disease rehabilitation patients. *Chinese Medical Journal*, doi: 10.1097/CM1099.0000000000000774 (2020).
13. Xing Y, *et al.* Prolonged presence of SARS-CoV-2 in feces of pediatric patients during the convalescent phase. *medRxiv*, 2020.2003.2011.20033159 (2020).
14. Xiao F, Tang M, Zheng X, Liu Y, Li X, Shan H. Evidence for Gastrointestinal Infection of SARS-CoV-2. *Gastroenterology* **158**, 1831-1833.e1833 (2020).
15. Wang D, *et al.* Clinical Characteristics of 138 Hospitalized Patients With 2019 Novel Coronavirus–Infected Pneumonia in Wuhan, China. *JAMA*

494           **323**, 1061-1069 (2020).

495   16. Ong SWX, *et al.* Air, Surface Environmental, and Personal Protective  
496       Equipment Contamination by Severe Acute Respiratory Syndrome  
497       Coronavirus 2 (SARS-CoV-2) From a Symptomatic Patient. *JAMA*,  
498       (2020).

499   17. Jung YJ, *et al.* Comparative analysis of primer-probe sets for the laboratory  
500       confirmation of SARS-CoV-2. *bioRxiv*, 2020.2002.2025.964775 (2020).

501   18. Nalla AK, *et al.* Comparative Performance of SARS-CoV-2 Detection  
502       Assays using Seven Different Primer/Probe Sets and One Assay Kit. *J*  
503       *Clin Microbiol*, JCM.00557-00520 (2020).

504   19. Schmittgen TD, Livak KJ. Analyzing real-time PCR data by the  
505       comparative CT method. *Nat Protoc* **3**, 1101-1108 (2008).

506   20. Nolan T, Hands RE, Bustin SA. Quantification of mRNA using real-time  
507       RT-PCR. *Nat Protoc* **1**, 1559-1582 (2006).

508   21. Auta HS, Emenike CU, Fauziah SH. Distribution and importance of  
509       microplastics in the marine environment: A review of the sources, fate,  
510       effects, and potential solutions. *Environ Int* **102**, 165-176 (2017).

511   22. Woo PCY, *et al.* Differential sensitivities of severe acute respiratory  
512       syndrome (SARS) coronavirus spike polypeptide enzyme-linked  
513       immunosorbent assay (ELISA) and SARS coronavirus nucleocapsid  
514       protein ELISA for serodiagnosis of SARS coronavirus pneumonia. *J Clin*  
515       *Microbiol* **43**, 3054-3058 (2005).

516   23. Amanat F, *et al.* A serological assay to detect SARS-CoV-2 seroconversion  
517       in humans. *medRxiv*, (2020).

518   24. Weiss S, *et al.* A High Through-put Assay for Circulating Antibodies  
519       Directed against the S Protein of Severe Acute Respiratory Syndrome  
520       Corona virus 2. *medRxiv*, 2020.2004.2014.20059501 (2020).

521   25. Stadlbauer D, *et al.* SARS-CoV-2 Seroconversion in Humans: A Detailed  
522       Protocol for a Serological Assay, Antigen Production, and Test Setup.  
523       *Current Protocols in Microbiology* **57**, e100 (2020).

524   26. Moskovits M. Surface-enhanced spectroscopy. *Reviews of Modern*  
525       *Physics* **57**, 783-826 (1985).

526   27. Stiles PL, Dieringer JA, Shah NC, Van Duyne RP. Surface-Enhanced  
527       Raman Spectroscopy. *Reviews in Analytical Chemistry* **1**, 601-626  
528       (2008).

529   28. Nam W, *et al.* Refractive-Index-Insensitive Nanolaminated SERS  
530       Substrates for Label-Free Raman Profiling and Classification of Living  
531       Cancer Cells. *Nano Lett* **19**, 7273-7281 (2019).

532   29. Vendrell M, Maiti KK, Dhaliwal K, Chang Y-T. Surface-enhanced Raman  
533       scattering in cancer detection and imaging. *Trends Biotechnol* **31**,  
534       249-257 (2013).

535   30. Zavaleta C, *et al.* Multiplexed imaging of surface enhanced Raman  
536       scattering nanotags in living mice using noninvasive Raman  
537       spectroscopy. *Proceedings of the National Academy of Sciences of the*

- 538 *United States of America* **106**, 13511-13516 (2009).
- 539 31. Zhang H, Harpster MH, Park HJ, Johnson PA, Wilson WC.  
540 Surface-Enhanced Raman Scattering Detection of DNA Derived from  
541 the West Nile Virus Genome Using Magnetic Capture of Raman-Active  
542 Gold Nanoparticles. *Anal Chem* **83**, 254-260 (2011).
- 543 32. Zhao Y, Zhao Z, Wang Y, Zhou Y, Ma Y, Zuo W. Single-cell RNA expression  
544 profiling of ACE2, the putative receptor of Wuhan 2019-nCov. *bioRxiv*,  
545 2020.2001.2026.919985 (2020).
- 546 33. Lan J, *et al.* Structure of the SARS-CoV-2 spike receptor-binding domain  
547 bound to the ACE2 receptor. *Nature*, (2020).
- 548 34. Zhang D, *et al.* Potential spreading risks and disinfection challenges of  
549 medical wastewater by the presence of Severe Acute Respiratory  
550 Syndrome Coronavirus 2 (SARS-CoV-2) viral RNA in septic tanks of  
551 fangcang hospital. *medRxiv*, 2020.2004.2028.20083832 (2020).
- 552 35. Shanmukh S, Jones L, Driskell J, Zhao Y, Dluhy R, Tripp RA. Rapid and  
553 Sensitive Detection of Respiratory Virus Molecular Signatures Using a  
554 Silver Nanorod Array SERS Substrate. *Nano Lett* **6**, 2630-2636 (2006).
- 555 36. Trevisan J, Angelov PP, Scott AD, Carmichael PL, Martin FL. IRootLab: a  
556 free and open-source MATLAB toolbox for vibrational biospectroscopy  
557 data analysis. *Bioinformatics* **29**, 1095-1097 (2013).
- 558 37. Theophilou G, Lima KM, Martin-Hirsch PL, Stringfellow HF, Martin FL.  
559 ATR-FTIR spectroscopy coupled with chemometric analysis  
560 discriminates normal, borderline and malignant ovarian tissue:  
561 classifying subtypes of human cancer. *Analyst* **141**, 585-594 (2016).
- 562 38. Kaznowska E, *et al.* The classification of lung cancers and their degree of  
563 malignancy by FTIR, PCA-LDA analysis, and a physics-based  
564 computational model. *Talanta* **186**, 337-345 (2018).
- 565 39. Gajjar K, *et al.* Diagnostic segregation of human brain tumours using  
566 Fourier-transform infrared and/or Raman spectroscopy coupled with  
567 discriminant analysis. *Analytical methods : advancing methods and*  
568 *applications* **5**, 89-102 (2012).
- 569 40. Duan P, *et al.* 4-Nonylphenol effects on rat testis and sertoli cells  
570 determined by spectrochemical techniques coupled with chemometric  
571 analysis. *Chemosphere* **218**, 64-75 (2018).
- 572 41. Rygula A, Majzner K, Marzec KM, Kaczor A, Pilarczyk M, Baranska M.  
573 Raman spectroscopy of proteins: a review. *Journal of Raman*  
574 *Spectroscopy* **44**, 1061-1076 (2013).
- 575 42. Chan JW, Taylor DS, Zwerdling T, Lane SM, Ihara K, Huser T.  
576 Micro-Raman spectroscopy detects individual neoplastic and normal  
577 hematopoietic cells. *Biophysical journal* **90**, 648-656 (2006).
- 578 43. Malini R, *et al.* Discrimination of normal, inflammatory, premalignant, and  
579 malignant oral tissue: A Raman spectroscopy study. *Biopolymers* **81**,  
580 179-193 (2006).
- 581 44. Ó Faoláin E, *et al.* A study examining the effects of tissue processing on



human tissue sections using vibrational spectroscopy. *Vib Spectrosc* **38**, 121-127 (2005).

45. Rau JV, *et al.* RAMAN spectroscopy imaging improves the diagnosis of papillary thyroid carcinoma. *Sci Rep* **6**, 35117 (2016).

46. Rozenberg M, Loewenschuss A, Marcus Y. An empirical correlation between stretching vibration redshift and hydrogen bond length. *Physical Chemistry Chemical Physics* **2**, 2699-2702 (2000).

47. Tomobe K, Yamamoto E, Kojić D, Sato Y, Yasui M, Yasuoka K. Origin of the blueshift of water molecules at interfaces of hydrophilic cyclic compounds. *Science Advances* **3**, e1701400 (2017).

48. Nordgren J, Matussek A, Mattsson A, Svensson L, Lindgren PE. Prevalence of norovirus and factors influencing virus concentrations during one year in a full-scale wastewater treatment plant. *Water Res* **43**, 1117-1125 (2009).

49. Kitajima M, Iker BC, Pepper IL, Gerba CP. Relative abundance and treatment reduction of viruses during wastewater treatment processes--identification of potential viral indicators. *Sci Total Environ* **488-489**, 290-296 (2014).

50. Hata A, Kitajima M, Katayama H. Occurrence and reduction of human viruses, F-specific RNA coliphage genogroups and microbial indicators at a full-scale wastewater treatment plant in Japan. *J Appl Microbiol* **114**, 545-554 (2013).

51. Kampf G, Todt D, Pfaender S, Steinmann E. Persistence of coronaviruses on inanimate surfaces and their inactivation with biocidal agents. *Journal Of Hospital Infection* **104**, 246-251 (2020).

52. van Doremalen N, *et al.* Aerosol and Surface Stability of SARS-CoV-2 as Compared with SARS-CoV-1. *New England Journal of Medicine* **382**, 1564-1567 (2020).
